# Supplementary material
Source: Springer Nature journal article supplement (https://www.springermedizin.de/resource/supplementary/12865_2009_308_MOESM3_ESM.pdf/9427718)

**A**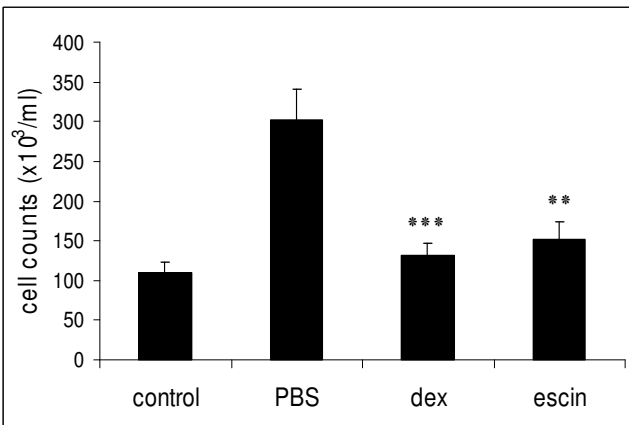**B**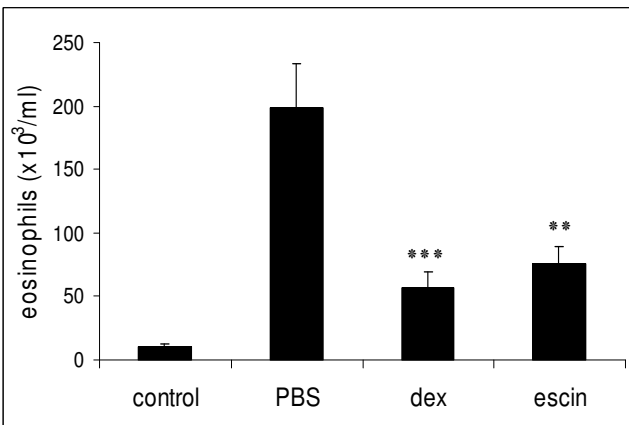

Supplement: MOESM3 [file 9427718]
